# Supplementary material for: Reciprocal insulation analysis of Hi-C data shows that TADs represent a functionally but not structurally privileged scale in the hierarchical folding of chromosomes
Source: HighWire-hosted journal article supplement (doi:10.1101/gr.212803.116), 2017-01-05
Supplement: Supplemental_Table_S1.xlsx [file Supplemental_Table_S1.xlsx]

## Sheet: Sheet1
lab	mark	paper	cell type	address
Ren	H3K4me3	ENCODE	ESC	https://www.encodeproject.org/experiments/ENCSR000CGO/
Ren	control	ENCODE	ESC	https://www.encodeproject.org/experiments/ENCSR095IPH/
Ren	H3K4me1	ENCODE	ESC	https://www.encodeproject.org/experiments/ENCSR000CGN/
Ren	H3K27ac	ENCODE	ESC	https://www.encodeproject.org/experiments/ENCSR000CGQ/
Ren	H3K9ac	ENCODE	ESC	https://www.encodeproject.org/experiments/ENCSR000CGP/
Ren	H3K36me3	ENCODE	ESC	https://www.encodeproject.org/experiments/ENCSR000CGR/
Hardison	H3K27me3	ENCODE	ESC	https://www.encodeproject.org/experiments/ENCSR059MBO/
Hardison	control	ENCODE	ESC	https://www.encodeproject.org/experiments/ENCSR326ULS/
Hardison	H3K9me3	ENCODE	ESC	https://www.encodeproject.org/experiments/ENCSR857MYS/
Hardison	CTCF	ENCODE	ESC	https://www.encodeproject.org/experiments/ENCSR362VNF/
Hardison	CTCF	ENCODE	CH12	https://www.encodeproject.org/experiments/ENCSR000DIU/
Hardison	H3K4me1	ENCODE	CH12	https://www.encodeproject.org/experiments/ENCSR000DHQ/
Hardison	H3K4me3	ENCODE	CH12	https://www.encodeproject.org/experiments/ENCSR000DHU/
Ren	H3K27ac	ENCODE	CH12	https://www.encodeproject.org/experiments/ENCSR000CGJ/
Corces VG	CTCF	Phillips-Cremins JE et al, Cell 2013	NPC	GSE36203
Jaenisch R	H3K27ac	Creyghton MP et al, PNAS 2010	NPC	GSM594585
Lander ES	H3K4me1	Meissner A et al, Nature 2008	NPC	GSE11172
Bernstein BE	H3K4me3	Mikkelsen TS et al, Nature 2007	NPC	GSE12241
Myers	CTCF	ENCODE	FLC	https://www.encodeproject.org/experiments/ENCSR397RHW/
Myers	control	ENCODE	FLC	https://www.encodeproject.org/experiments/ENCSR999LAC/
